# Supplementary material for: COMMD1 and PtdIns(4,5)P2 interaction maintain ATP7B copper transporter trafficking fidelity in HepG2 cells
Source: Oxford University Press journal article supplement (doi:10.1242/jcs.231753), 2019-09-12
Supplement: jcs231753supp.pdf [file jcs231753supp.pdf]

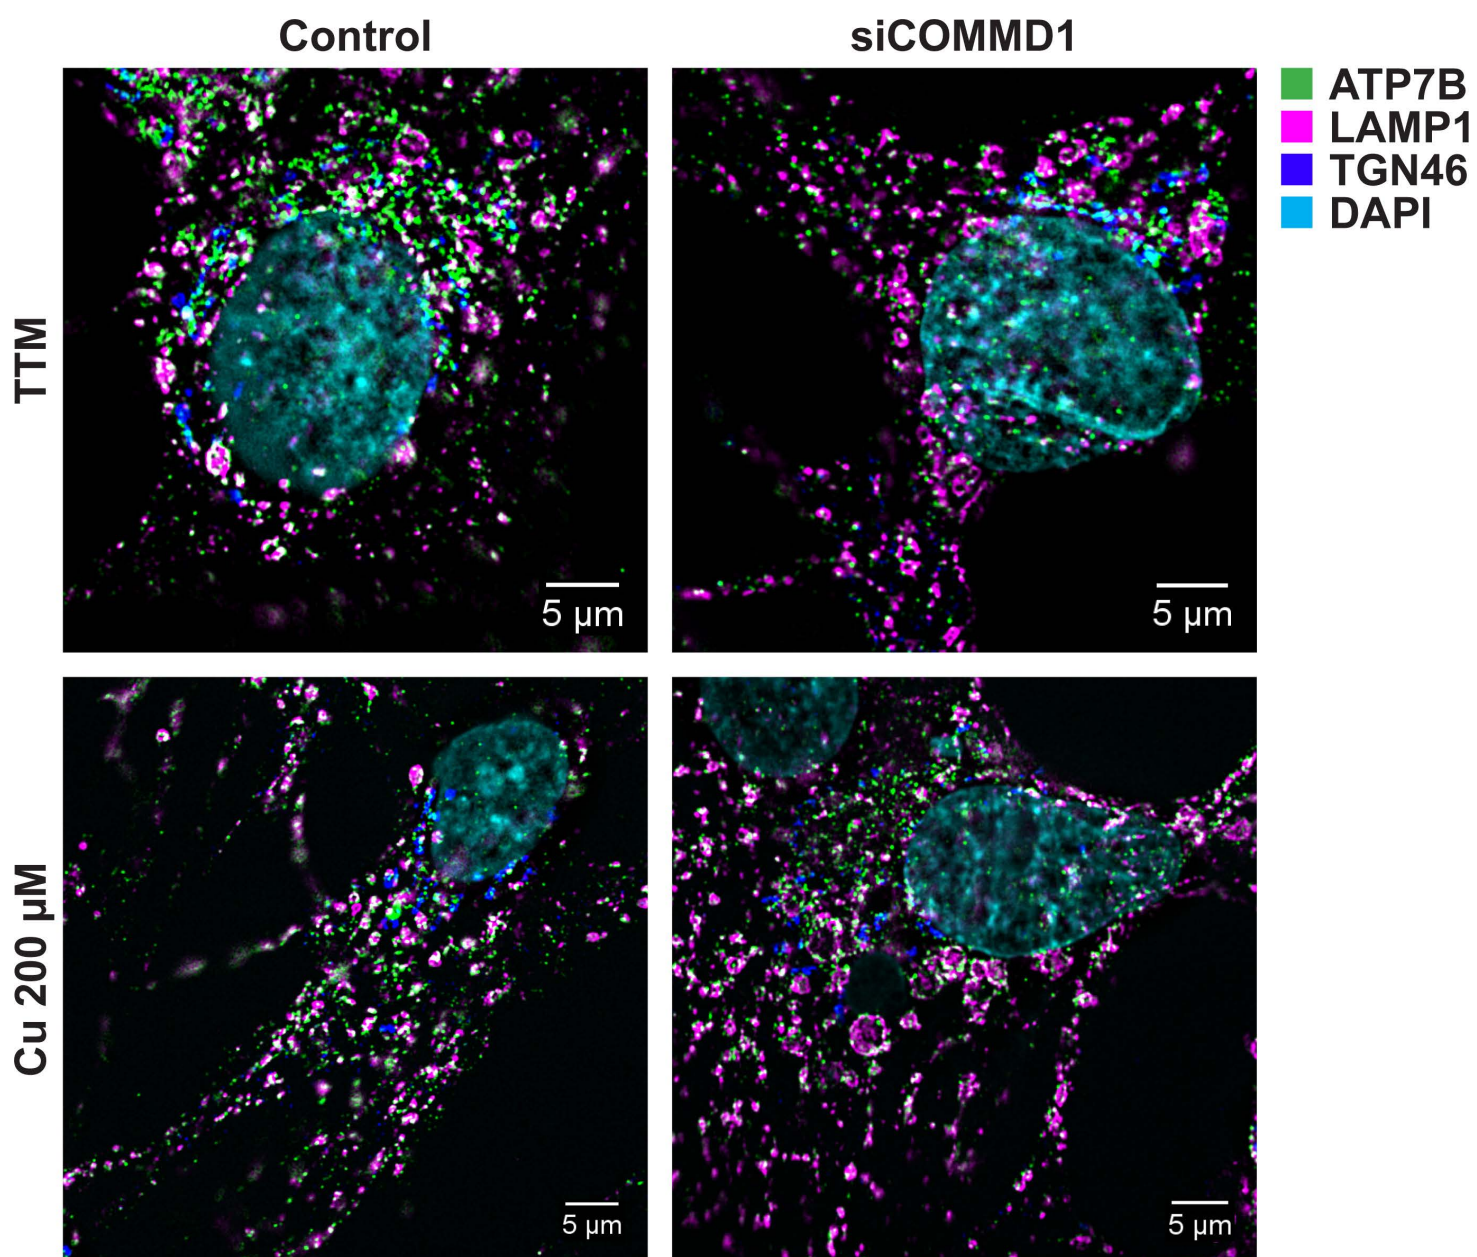

**Figure S1.** Example images corresponding to Figure 2, Colocalization of ATP7B with TGN46 or LAMP1 in cells with reduced COMMD1 expression. False-colored channels are indicated, Magenta-green overlap is white.

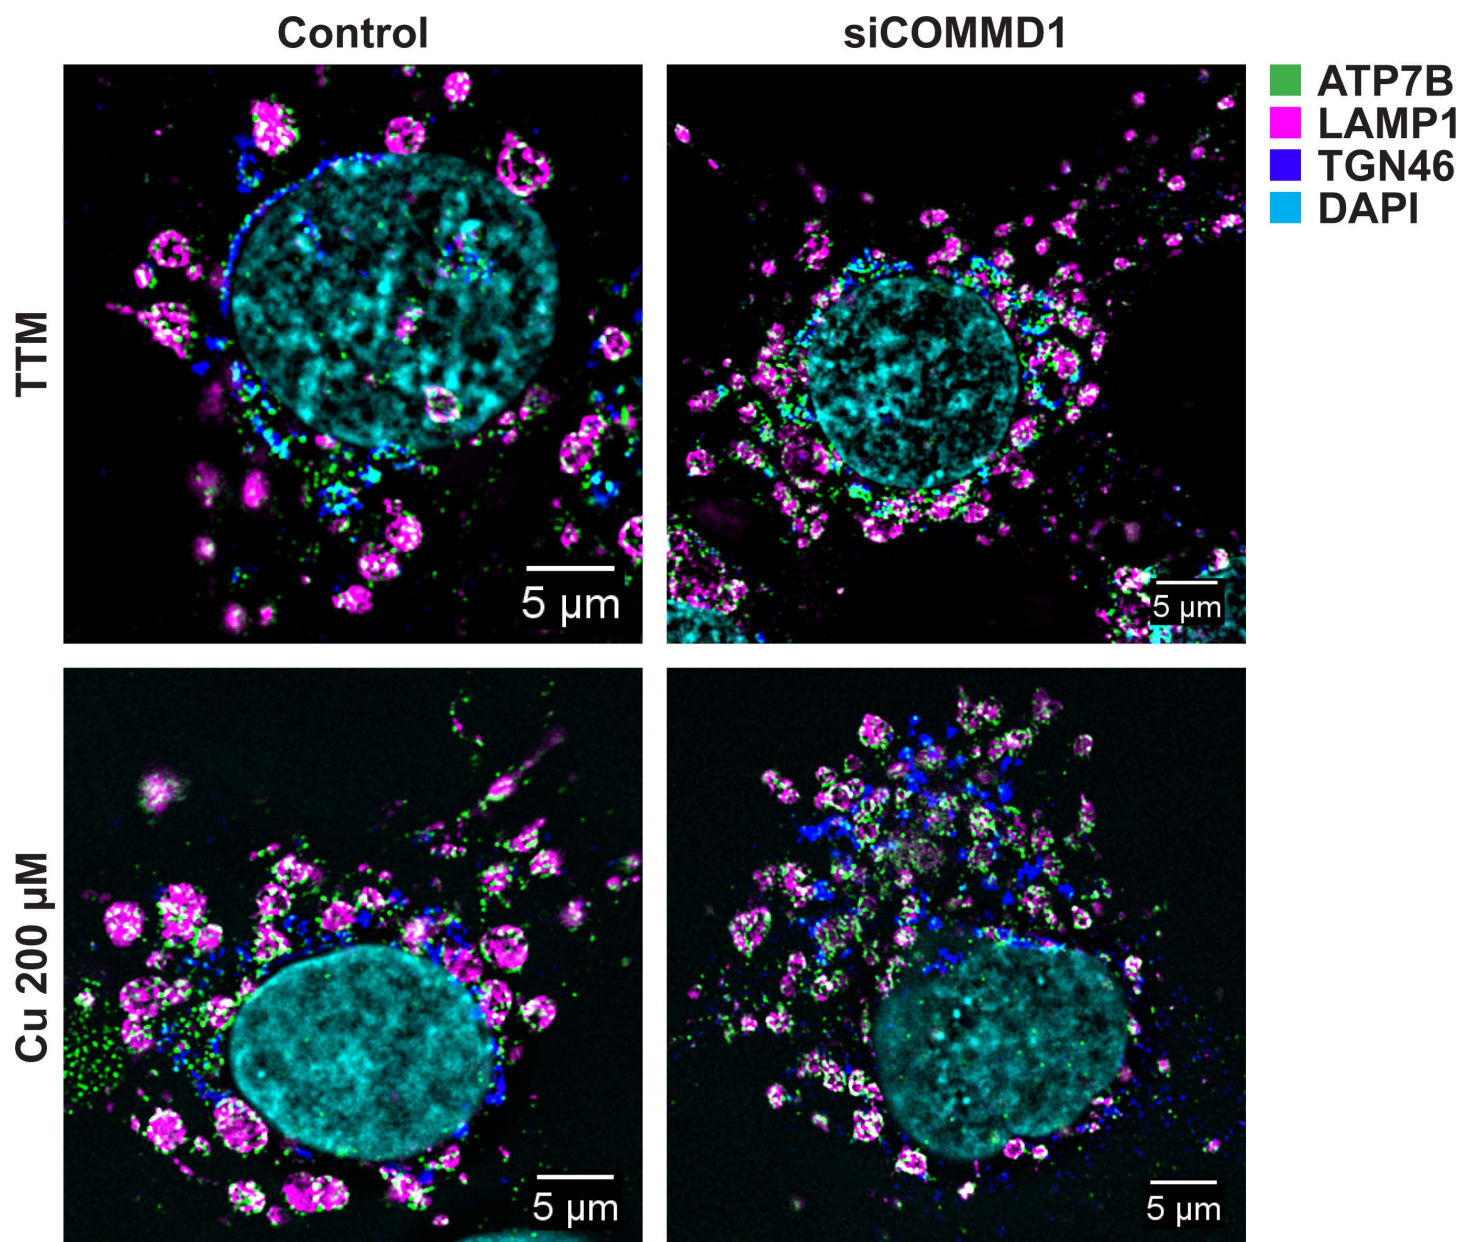

**Figure S2.** Example images corresponding to Figure 3. Colocalization of ATP7B with TGN46 or LAMP1 in cells with reduced COMMD1 expression as well as proteasome and lysosome inhibition. False-colored channels are indicated, Magenta-green overlap is white.

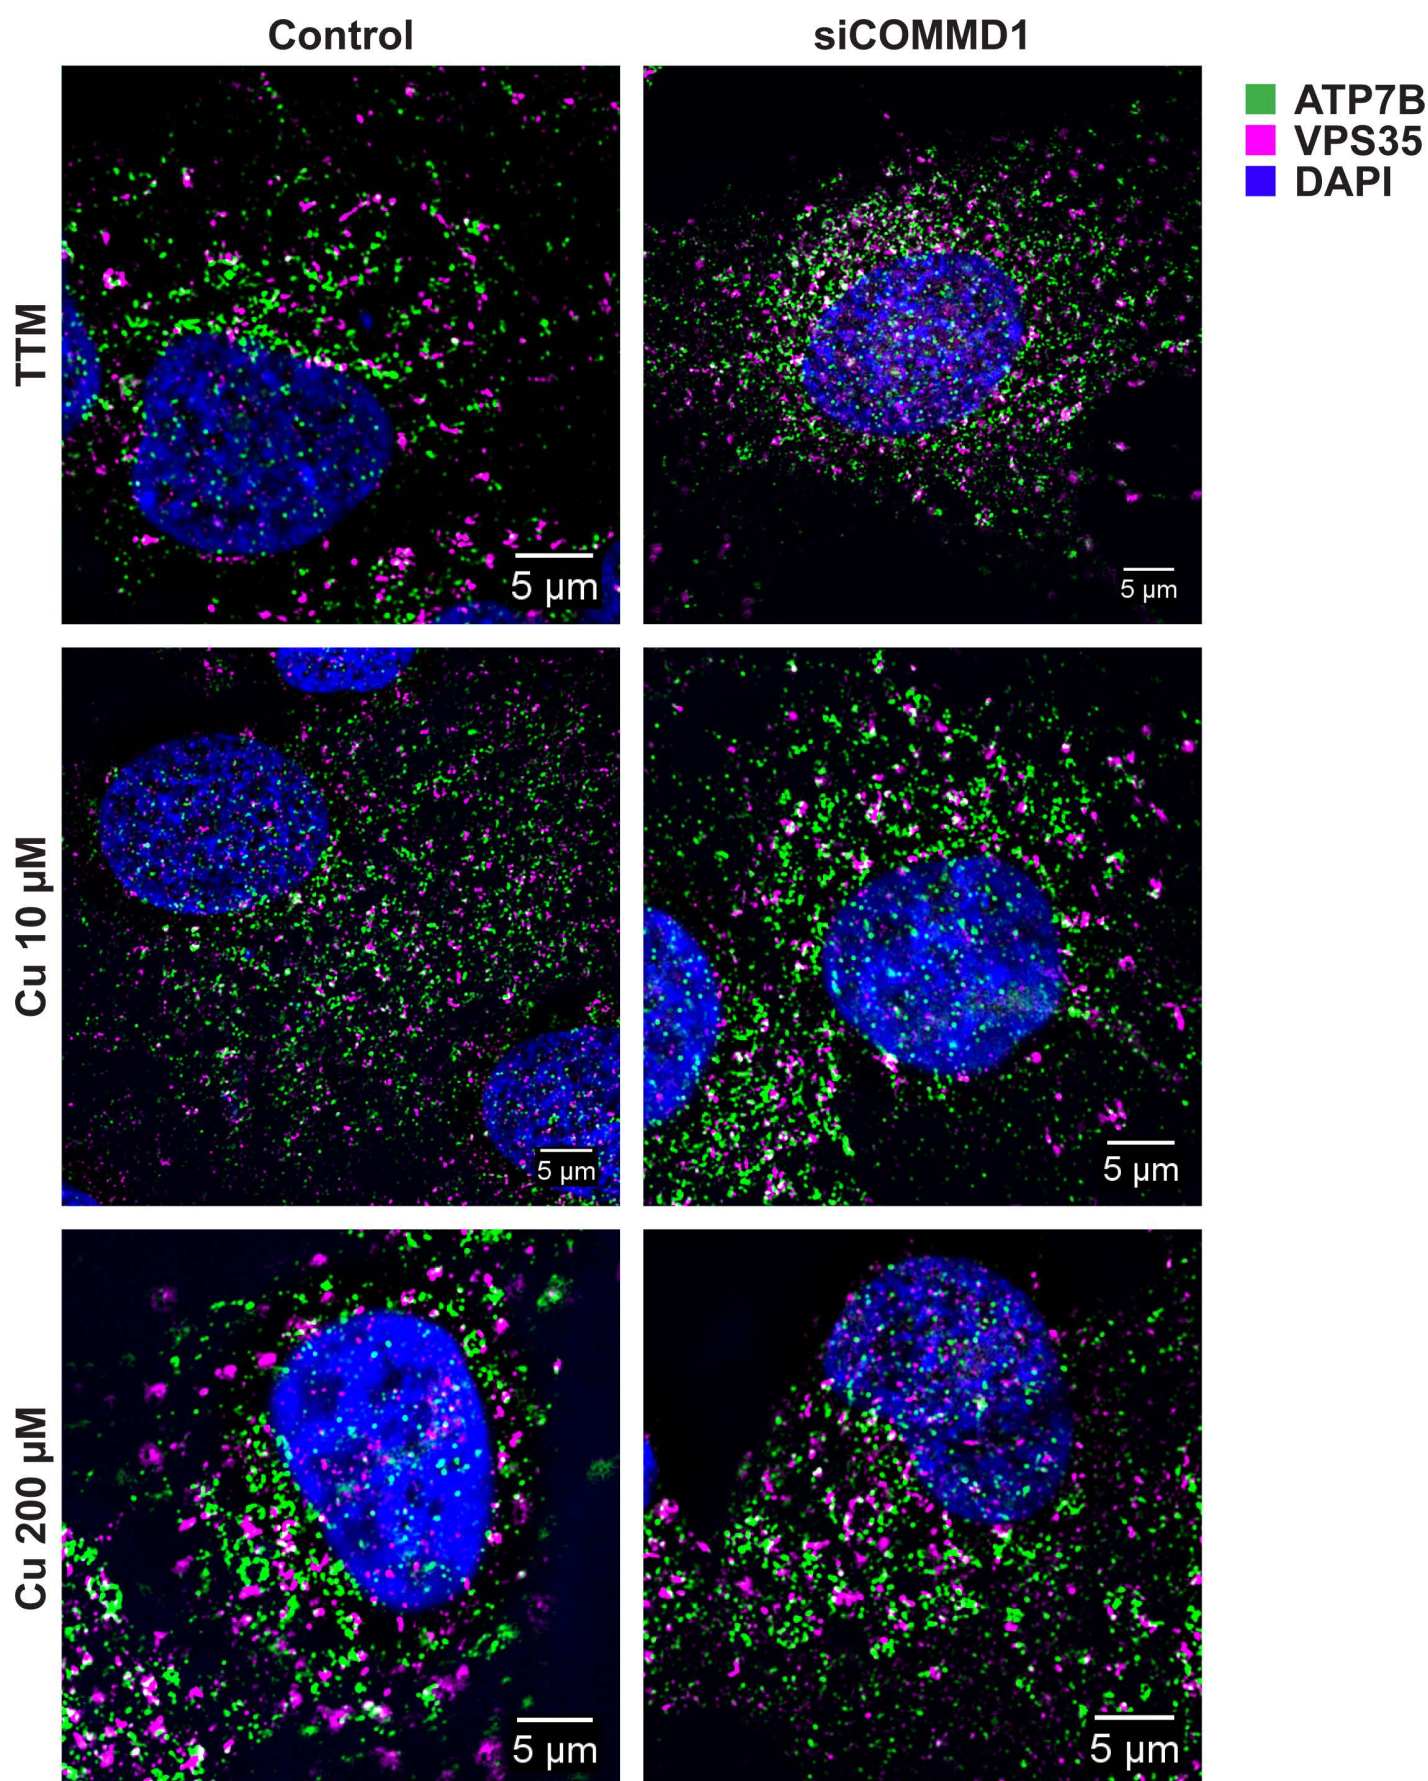

**Figure S3.** Example images corresponding to Figure 2, Colocalization of ATP7B with the retromer subunit VPS35. False-colored channels are indicated, Magenta-green overlap is white.

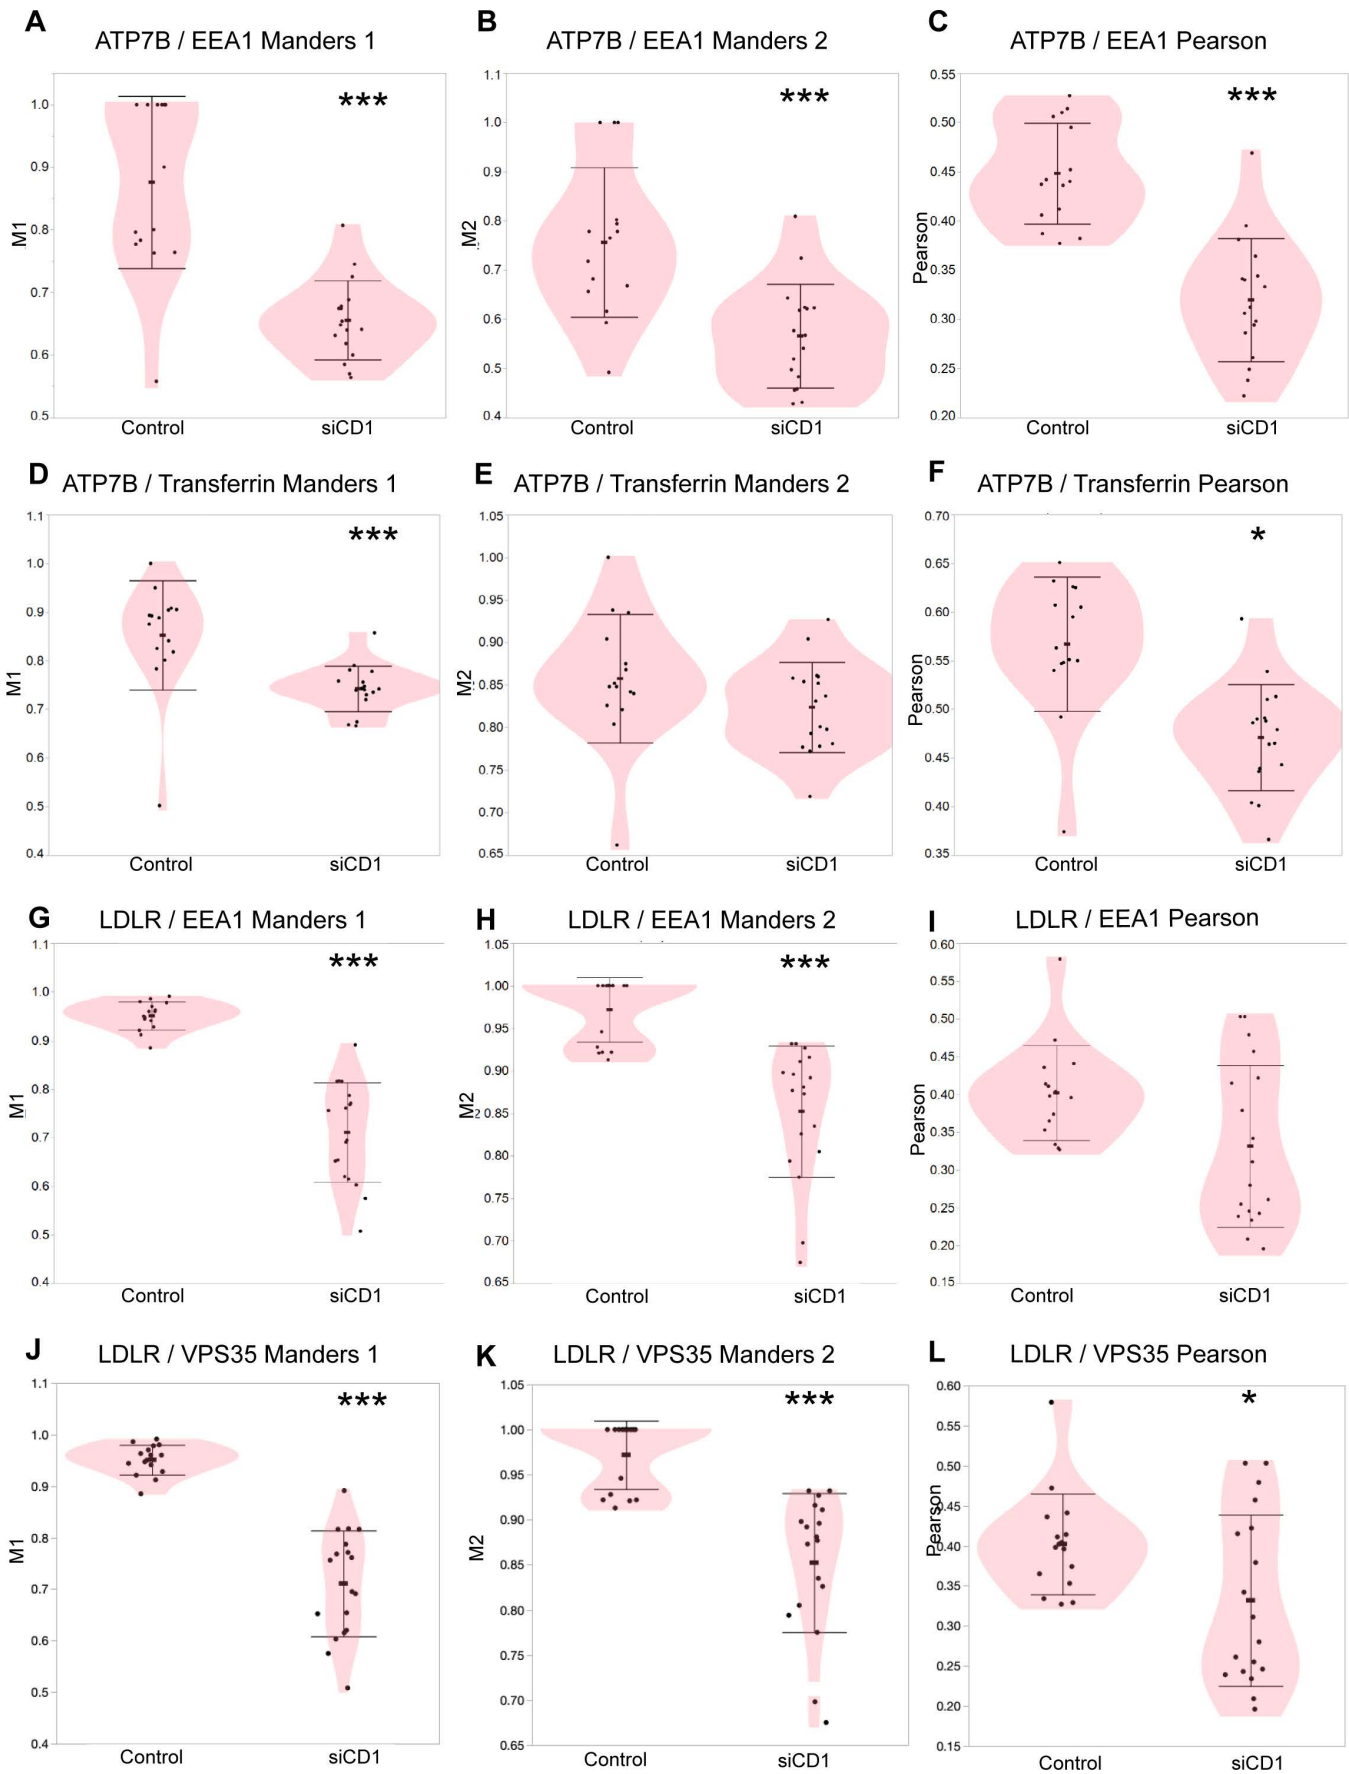

**Figure S4.** Colocalization of ATP7B (A-F) and LDLR (G-L) with indicated endosomal markers when COMMD1 expression is reduced. "\*\*\*" indicates a p-value < 0.05, "\*\*\*\*" indicates p-value < 0.001.

### ATP7B and *trans*-Golgi

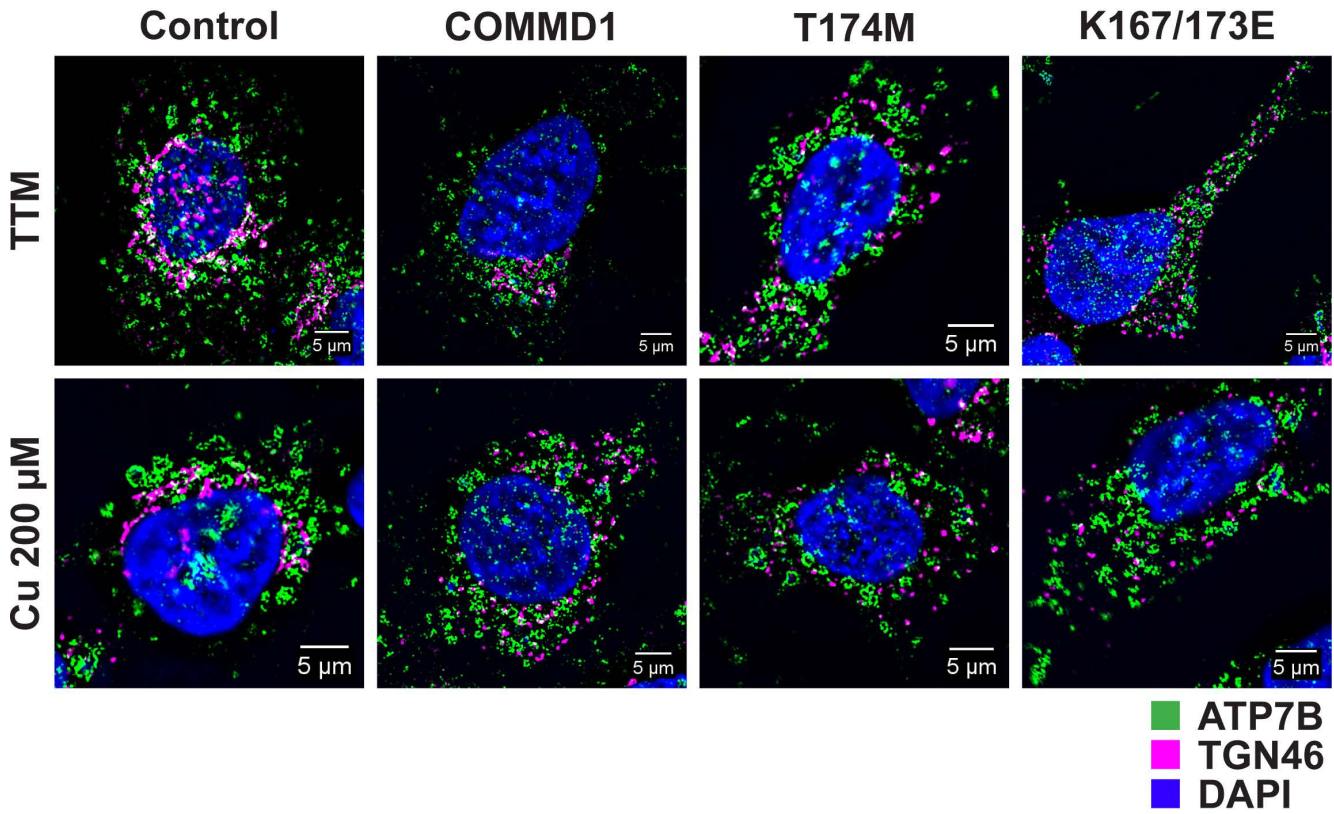

### ATP7B and Lysosomes

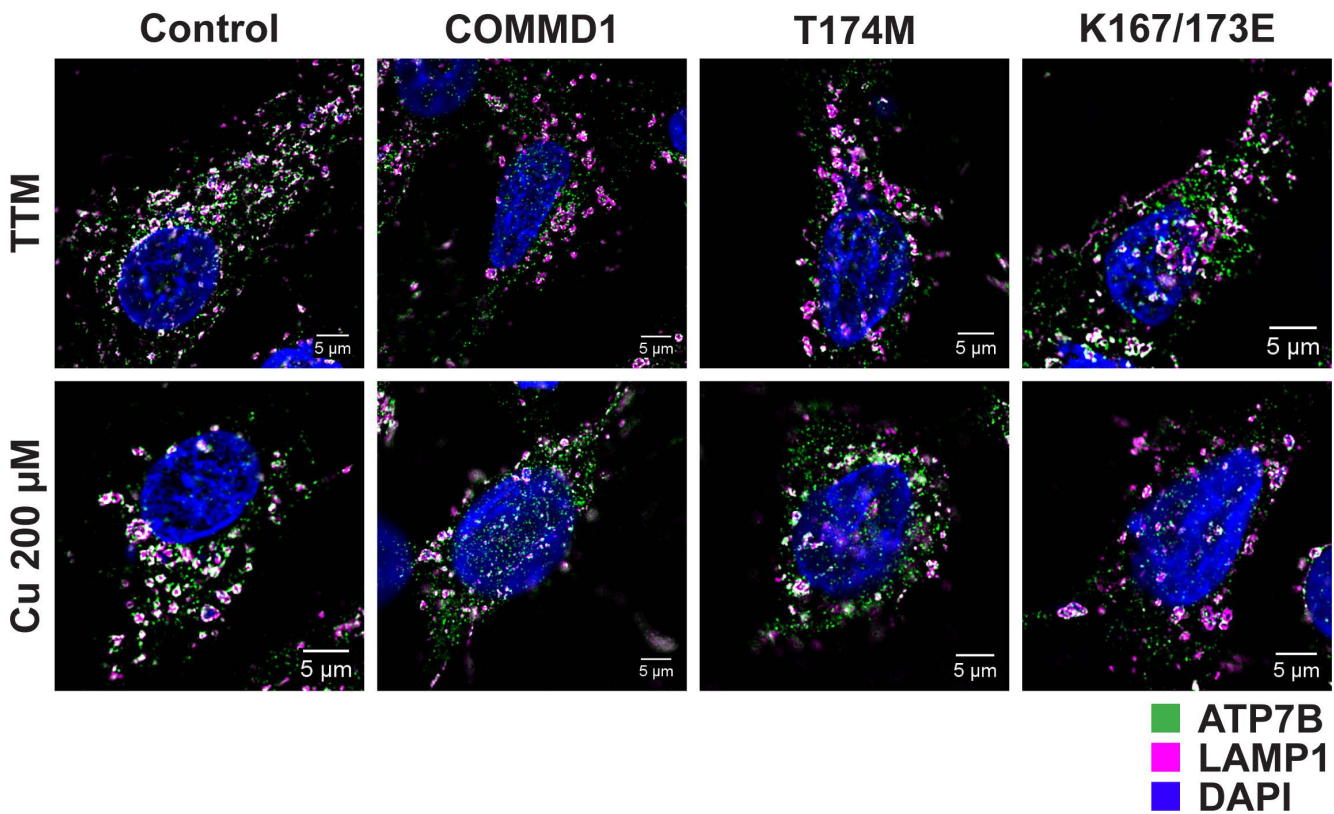

**Figure S5.** Example images for Figure 5 data. Colocalization of ATP7B with TGN46 (top) and LAMP1 (botto) markers when COMMD1 wild type and indicated mutants are overexpressed.

## ATP7B and *trans*-Golgi

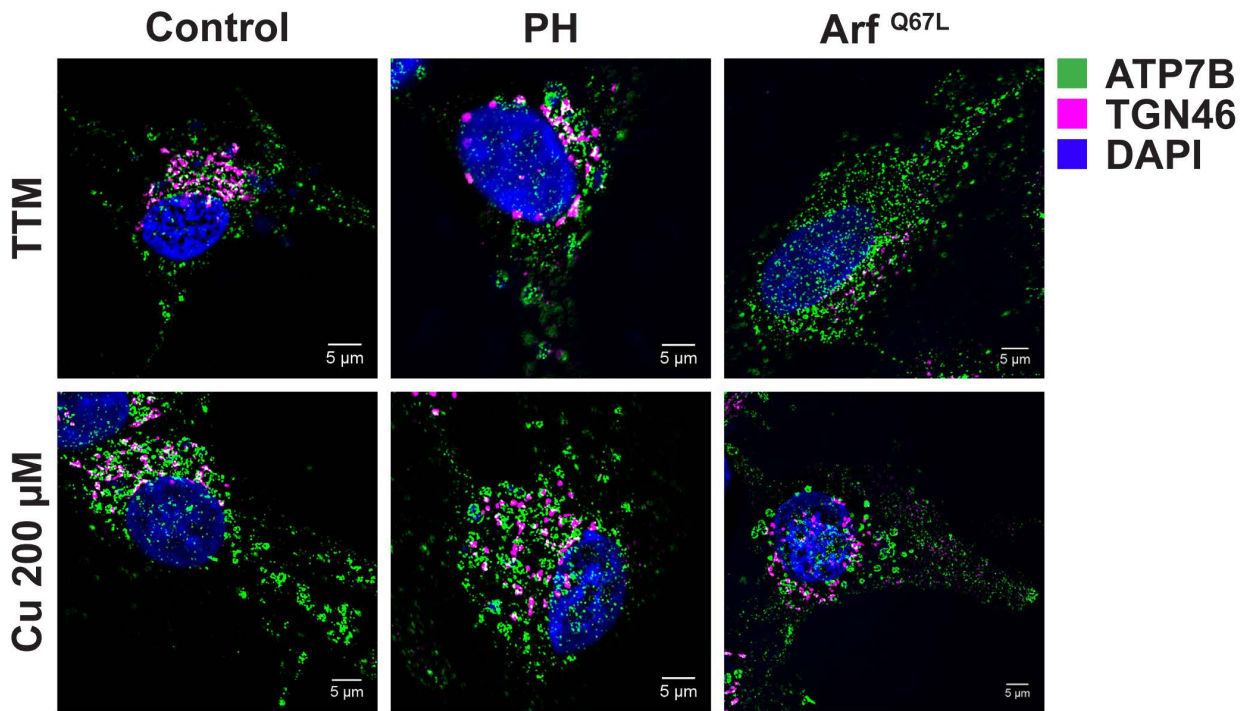

## ATP7B and Lysosomes

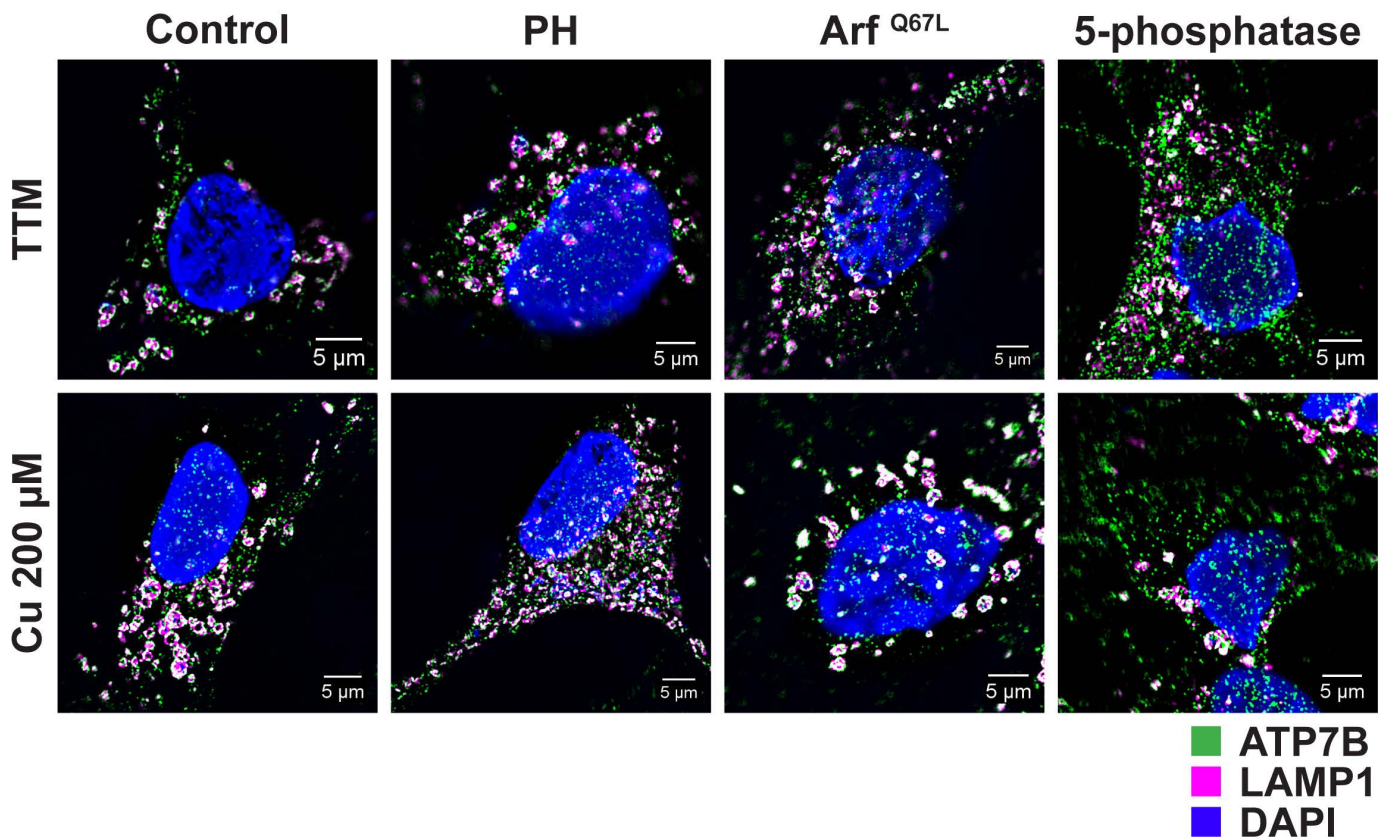

**Figure S6.** Example images for Figure 8 data. Colocalization of ATP7B with TGN46 (top) and LAMP1 (bottom) markers when PtdIns(4,5)P<sub>2</sub>-modifiers are overexpressed.

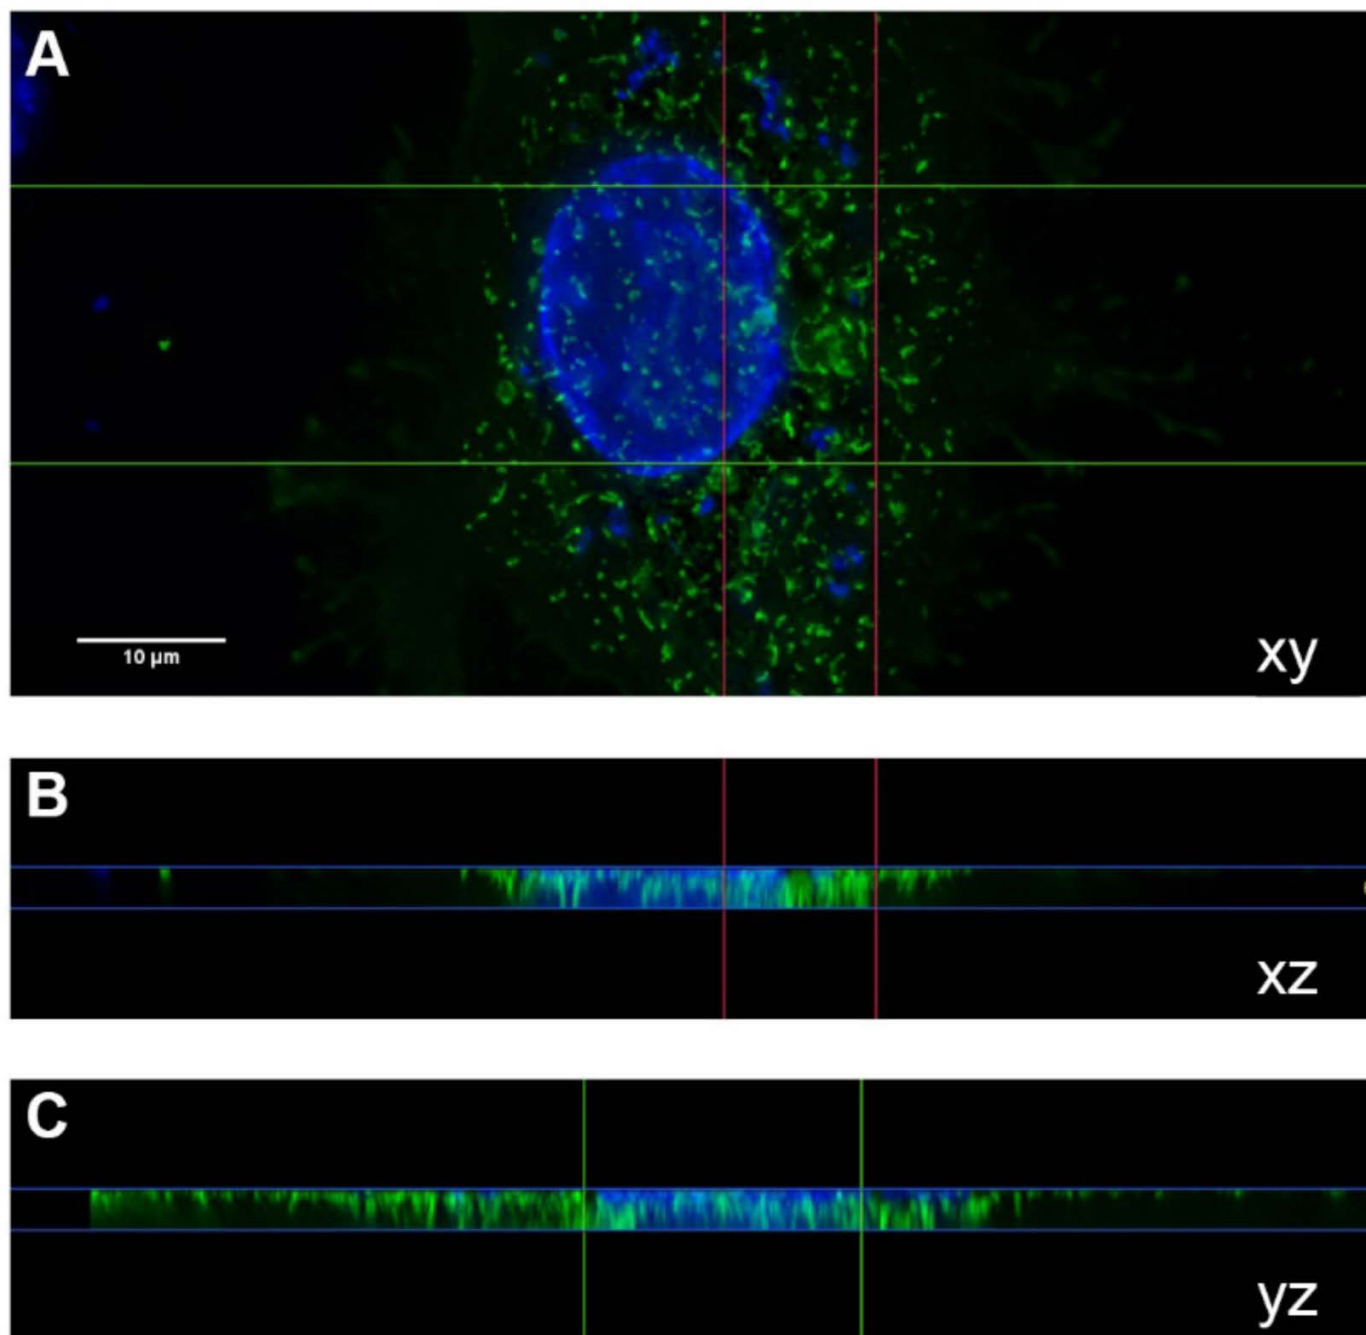

**Figure S7.** Intracellular localization of Pleckstrin homology domain in HepG2 cells. Cells were transfected with vectors containing GFP tagged Pleckstrin homology domain (PH-GFP) then imaged in 12-14 image stacks. Image stacks were deconvolved then visualized and analyzed using Huygens Professional.

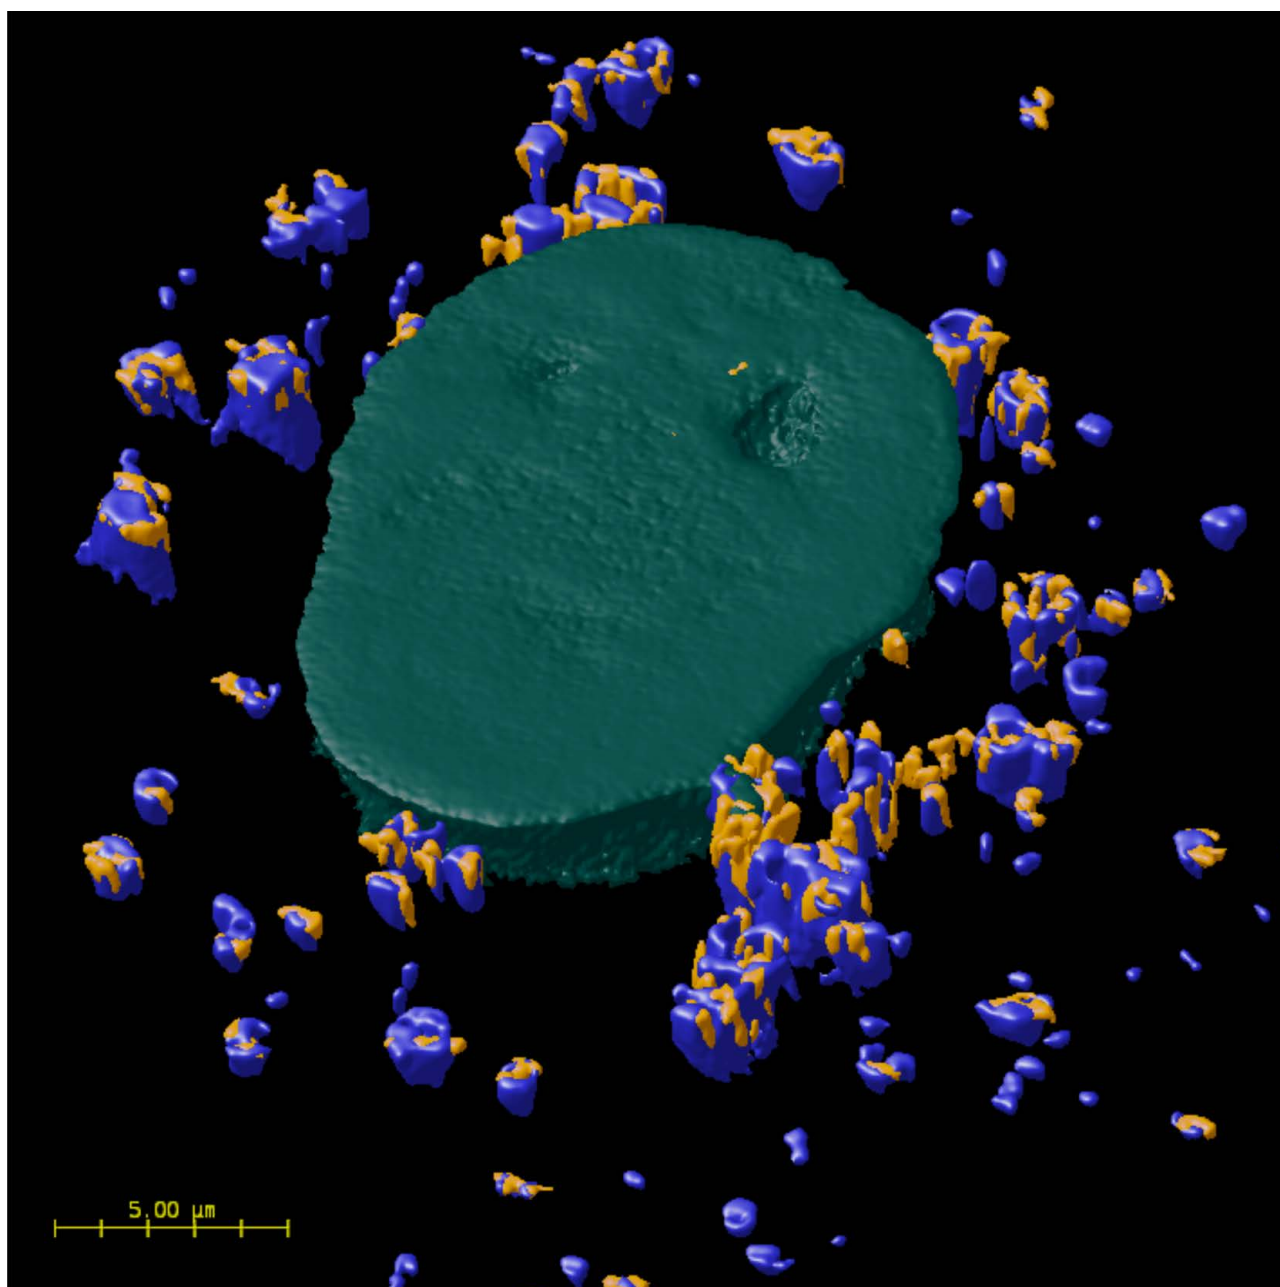

**Figure S8.** 3D surface render of ATP7B (yellow), LAMP1 (blue), and the nucleus (cyan). ATP7B is observed localized at the surface of lysosomes. HepG2 cells were imaged in stacks of 12-14 image slices with z-steps of 0.198 $\mu$ m. Image stacks were deconvolved and a 3D surface render was created using Huygens Professional.
